# Supplementary material
Source: PubMed Central journal article supplement (PMC3242614)
Supplement: auto0710_1145SD1.pdf [file auto0710_1145SD1.pdf]

Suppl. Table 1. List of sequences used in this study with GenBank or NtGI EST accession numbers.

| Acc No/Protein/Corresponding gene | Organism                       | Predicted protein length in aa |
|-----------------------------------|--------------------------------|--------------------------------|
| <b>p62/NBR1/Joka2</b>             |                                |                                |
| NP_194200                         | <i>Arabidopsis thaliana</i>    | 704                            |
| XP_661032                         | <i>Aspergillus nidulans</i>    | 1524                           |
| NP_788814                         | <i>Bos taurus</i>              | 440                            |
| AAI49980                          | <i>Bos taurus</i>              | 986                            |
| NP_502280.2                       | <i>Caenorabditis elegans</i>   | 693                            |
| NP_501086                         | <i>Caenorabditis elegans</i>   | 498                            |
| AAI41800                          | <i>Danio rerio</i>             | 992                            |
| XP_001920616                      | <i>Danio rerio</i>             | 625                            |
| AAF53824                          | <i>Drosophila melanogaster</i> | 599                            |
| XP_418128                         | <i>Gallus gallus</i>           | 956                            |
| XP_001233249                      | <i>Gallus gallus</i>           | 376                            |
| NP_003891                         | <i>Homo sapiens</i>            | 440                            |
| NP_005890                         | <i>Homo sapiens</i>            | 966                            |
| XP_001102347                      | <i>Macaca mulatta</i>          | 439                            |
| XP_001097043                      | <i>Macaca mulatta</i>          | 965                            |
| NP_035148                         | <i>Mus musculus</i>            | 442                            |
| NP_032702                         | <i>Mus musculus</i>            | 988                            |
| HQ025921                          | <i>Nicotiana tabacum</i>       | 843                            |
| NP_001047302                      | <i>Oryza sativa</i>            | 845                            |
| XP_518154                         | <i>Pan troglodytes</i>         | 440                            |
| XP_001155220                      | <i>Pan troglodytes</i>         | 895                            |
| XP_001765979                      | <i>Physcomytrella patents</i>  | 732                            |
| NP_001125548                      | <i>Pongo abelii</i>            | 440                            |
| NP_001127309                      | <i>Pongo abelii</i>            | 894                            |
| XP_002321635                      | <i>Populus trichocarpa</i>     | 673                            |
| NP_787037                         | <i>Rattus norvegicus</i>       | 439                            |
| NP_001019936                      | <i>Rattus norvegicus</i>       | 983                            |
| XP_002511320                      | <i>Ricinus communis</i>        | 754                            |
| XP_002454107                      | <i>Sorghum bicolor</i>         | 849                            |
| ABB18390                          | <i>Triticum aestivum</i>       | 870                            |
| XP_002277480                      | <i>Vitis vinifera</i>          | 910                            |
| ACN33320                          | <i>Zea mays</i>                | 842                            |
| <b>ATG8/UBL family</b>            |                                |                                |
| AAP21330.1/ATG8a/At4g21980        | <i>Arabidopsis thaliana</i>    | 122                            |
| NP_849298/ATG8b/At4g04620         | <i>Arabidopsis thaliana</i>    | 122                            |
| NP_176395/ATG8c/At1g62040         | <i>Arabidopsis thaliana</i>    | 119                            |
| AAO23655.1/ATG8d/At2g05630        | <i>Arabidopsis thaliana</i>    | 120                            |
| NP_850431/ATG8e/At2g45170         | <i>Arabidopsis thaliana</i>    | 122                            |
| NP_849395.1/ATG8f/At4g16520       | <i>Arabidopsis thaliana</i>    | 121                            |
| NP_191623/ATG8g/At3g60640         | <i>Arabidopsis thaliana</i>    | 121                            |
| NP_566283/ATG8h/At3g06420         | <i>Arabidopsis thaliana</i>    | 119                            |
| ABD38893/ATG8i/At3g15580          | <i>Arabidopsis thaliana</i>    | 115                            |
| TC107227/NtATG8f                  | <i>Nicotiana tabacum</i>       | 122                            |
| TC99613                           | <i>Nicotiana tabacum</i>       | 120                            |
| TC105161                          | <i>Nicotiana tabacum</i>       | 125                            |
| TC115968                          | <i>Nicotiana tabacum</i>       | 117                            |
| TC89388                           | <i>Nicotiana tabacum</i>       | 122                            |
| TC93678                           | <i>Nicotiana tabacum</i>       | 118                            |
| TC92507                           | <i>Nicotiana tabacum</i>       | 126                            |
| TC96782                           | <i>Nicotiana tabacum</i>       | 122                            |
| TC96352                           | <i>Nicotiana tabacum</i>       | 122                            |

|                                                         |                                  |                      |
|---------------------------------------------------------|----------------------------------|----------------------|
| TC95560                                                 | <i>Nicotiana tabacum</i>         | 126                  |
| TC115354                                                | <i>Nicotiana tabacum</i>         | 125                  |
| AM841450                                                | <i>Nicotiana tabacum</i>         | 117                  |
| FG635310                                                | <i>Nicotiana tabacum</i>         | 118                  |
| TC92677                                                 | <i>Nicotiana tabacum</i>         | 127                  |
| TC95557                                                 | <i>Nicotiana tabacum</i>         | 119                  |
| <b>UP9/LSU-like family</b>                              |                                  |                      |
| DQ444223/UP9A                                           | <i>Nicotiana tabacum</i>         | 117                  |
| AY547446/UP9C                                           | <i>Nicotiana tabacum</i>         | 117                  |
| NP_190527/LSU1/At3g49580                                | <i>Arabidopsis thaliana</i>      | 94                   |
| NP_197854/LSU2/At5g24660                                | <i>Arabidopsis thaliana</i>      | 94                   |
| NP_190526LSU3/At3g49570                                 | <i>Arabidopsis thaliana</i>      | 97                   |
| NP_568450/LSU4/At5g24655                                | <i>Arabidopsis thaliana</i>      | 92                   |
| <b>Protein partners of UP9C described in this study</b> |                                  |                      |
| DQ444220/Joka2                                          | <i>Nicotiana plumbaginifolia</i> | 467 (incomplete orf) |
| DQ444222/Joka8                                          | <i>Nicotiana plumbaginifolia</i> | 360 (incomplete orf) |
| DQ444221/Joka20                                         | <i>Nicotiana plumbaginifolia</i> | 161 (incomplete orf) |

Suppl. Table 2. List of the plasmids used in this study.

| Name                                                                 | Source/Reference/Description                                                 |
|----------------------------------------------------------------------|------------------------------------------------------------------------------|
| <b>Vectors</b>                                                       |                                                                              |
| pDEST22                                                              | Invitrogen, PQ10001-01                                                       |
| pDEST32                                                              | Invitrogen, PQ10001-01                                                       |
| pK7CWG2                                                              | Karimi et al. 81                                                             |
| pH7YWG2                                                              | Karimi et al. 81                                                             |
| pH7WGC2                                                              | Karimi et al. 81                                                             |
| pDONR221                                                             | Invitrogen, 12536017                                                         |
| pENTR-D TOPO                                                         | Invitrogen, K2400                                                            |
| pGEX4T-1                                                             | GE Healthcare Bio-Sciences AB,28-9545-49                                     |
| pGBT9                                                                | GenBank Acc # U07646                                                         |
| pGAD424                                                              | GenBank Acc # U07647                                                         |
| pGAD10                                                               | GenBank Acc # U13188                                                         |
| pET28a                                                               | Novagen, 69864-3                                                             |
| pDEST15                                                              | Invitrogen, 11802-014                                                        |
| <b>cDNA constructs made by traditional cloning</b>                   |                                                                              |
| pJoka2                                                               | Joka2 from <i>N. plumbaginifolia</i> (NpJoka2) in pGAD10                     |
| pJoka8                                                               | Joka8 from <i>N. plumbaginifolia</i> (NpJoka8) in pGAD10                     |
| pJoka20                                                              | Joka20 from <i>N. plumbaginifolia</i> (NpJoka20) in pGAD10                   |
| pJK1                                                                 | UP9C from <i>N. tabacum</i> in pGBT9                                         |
| pJK2                                                                 | UP9C from <i>N. tabacum</i> in pGAD424                                       |
| pLSU1                                                                | At3g49580 from <i>A. thaliana</i> in pGBT9                                   |
| pLSU2                                                                | At5g24660 from <i>A. thaliana</i> in pGBT9                                   |
| pLSU3                                                                | At3g49570 from <i>A. thaliana</i> in pGBT9                                   |
| pLSU4                                                                | At5g24655 from <i>A. thaliana</i> in pGBT9                                   |
| pJK11                                                                | NpJoka2 in pGBT9; ORF length as in pJoka2                                    |
| pHis-UP9C                                                            | UP9C from <i>N. tabacum</i> in pET28a                                        |
| pGST-PB1                                                             | 0.7 kb EcoRI-EcoRI fragment from pJoka2 (1-684bp/1-228 aa) in pGEX4T-1       |
| pGST-ZZ                                                              | 0.74 kb EcoRI-EcoRI fragment from pJoka2 (685-1403bp/229-467 aa) in pGEX4T-1 |
| pGST-Joka8                                                           | 1.12 kb EcoRI-EcoRI fragment from pJoka8 in pGEX4T-1                         |
| pGST-Joka20                                                          | 0.65 kb EcoRI-EcoRI fragment from pJoka20 in pGEX4T-1                        |
| pHis-ATG8f                                                           | ATG8f from <i>N. tabacum</i> in pET28a                                       |
| <b>cDNA constructs made by traditional cloning into entry vector</b> |                                                                              |
| pEntrPB1                                                             | PB1 domain (1-1266 bp/1-422 aa) from NtJoka2 in pENTR                        |
| pEntrPB1ZZ                                                           | PB1ZZ domain (1-2253 bp/1-751 aa) from NtJoka2 in pENTR                      |
| pEntrZZ                                                              | ZZ domain (316-2253 bp/106-751 aa) from NtJoka2 in pENTR                     |
| pEntrZZUBA                                                           | ZZUBA domain (316-2526 bp/106-842 aa) from NtJoka2 in pENTR                  |
| pEntrATG8f                                                           | NtATG8f cDNA in pENTR                                                        |
| <b>cDNA constructs made by Gateway BP reaction</b>                   |                                                                              |
| pEntrJ                                                               | full -length NtJoka2 in pDONR221                                             |
| pEntrB                                                               | UP9C in pDONR221                                                             |
| <b>cDNA constructs made by Gateway LR reaction</b>                   |                                                                              |
| pJ4                                                                  | full-length NtJoka2 from pEntrJ in pH7YWG2                                   |
| pJ5                                                                  | full-length NtJoka2 from pEntrJ in pK7CWG2                                   |
| pATG8f                                                               | full-length NtATG8f from pEntrATG8f in pH7WGC2                               |
| pDEST22/PB1                                                          | PB1 domain (1-1266bp/1-422aa) of NtJoka2 from pEntrPB1 in pDEST22            |
| pDEST32/PB1                                                          | PB1 domain (1-1266bp/1-422aa) of NtJoka2 from pEntrPB1 in pDEST32            |

|               |                                                                              |
|---------------|------------------------------------------------------------------------------|
| pDEST22/PB1ZZ | PB1-ZZ domains (1-2253bp/1-751aa) of NtJoka2 from pEntrPB1ZZ in pDEST22      |
| pDEST32/PB1ZZ | PB1-ZZ domains (1-2253bp/1-751aa) of NtJoka2 from pEntrPB1ZZ in pDEST32      |
| pDEST22/ZZ    | ZZ domain (316-2253bp/106-751aa) of NtJoka2 from pEntrZZ in pDEST22          |
| pDEST32/ZZ    | ZZ domain (316-2253bp/106-751aa) of NtJoka2 from pEntrZZ in pDEST32          |
| pDEST22/ZZUBA | ZZ-UBA domains (316-2526bp/106-842aa) of NtJoka2 from pEntrZZUBA in pDEST22  |
| pDEST32/ZZUBA | ZZ-UBA domains (316-2526bp/106-842 aa) of NtJoka2 from pEntrZZUBA in pDEST32 |
| pDEST22/ATG8f | full-length ATG8f from pEntrATG8f in pDEST22                                 |
| pDEST32/ATG8f | full-length ATG8f from pEntrATG8f in pDEST32                                 |
| pDEST22/UP9   | full-length UP9C from pEntrUP9 in pDEST22                                    |
| pDEST32/UP9   | full-length UP9C from pEntrUP9 in pDEST32                                    |
| pDEST15/Joka2 | full -length NtJoka2 in pDEST15                                              |

Suppl. Table 3. List of the oligonucleotides used as forward (F) and reverse (R) primers. All primers are shown from 5' to 3'.

| <b><i>Cloning by Gateway technology (start and stop codons are underlined)</i></b>                                      |                                                         |
|-------------------------------------------------------------------------------------------------------------------------|---------------------------------------------------------|
| F: <u>caccatgg</u> cctatggagtctgct<br>R: aatag <u>tcccag</u> tcccacactg                                                 | used to amplify PB1 region of <i>NtJoka2</i>            |
| F: <u>caccatgt</u> tctactcccttacgac<br>R: ctggggtgggctgcgcg                                                             | used to amplify ZZ region of <i>NtJoka2</i>             |
| F: <u>caccatgg</u> cctatggagtctgct<br>R: ctggggtgggctgcgcg                                                              | used to amplify PB1-ZZ region of <i>NtJoka2</i>         |
| F: <u>caccatgt</u> tctactcccttacgac<br>R: ctctccagcaataagatccatg                                                        | used to amplify ZZ-UBA region of <i>NtJoka2</i>         |
| F: <u>caccatgg</u> caaaagagttcattc<br>R: ccatgaa <u>agttac</u> caacaaagttg                                              | used to amplify <i>NtATG8f</i>                          |
| F: ggggacaagttgtacaaaaagcaggctca <u>atgg</u> cctatggagtctgctat<br>R: ggggaccactttgtacaagaaagctgggtcctgctctccagaataagatc | used to amplify <i>NtJoka2</i>                          |
| F: ggggacaagttgtacaaaaagcaggctca <u>atg</u> tttcgacaattgctgt<br>R: ggggaccactttgtacaagaaagctgggtcttgggaactgggaacggtaa   | used to amplify <i>UP9C</i>                             |
| <b><i>RT-PCR</i></b>                                                                                                    |                                                         |
| F: cctccacatgctattctcc<br>R: agagcctccaatccagacac                                                                       | <i>Tac9</i> (GB# X69885)                                |
| F: cgggatccatgttttcgacaattgct<br>R: gcaagcttggctacctcattgggaactgggaac                                                   | <i>UP9C/UP9A</i> (primers amplify both genes)           |
| F: gcttcacgtctagtccaggt<br>R: gggctcctgcgtatctaca                                                                       | <i>NtJoka2</i>                                          |
| F: <u>caccatgg</u> caaaagagttcattc<br>R: ccatgaa <u>agttac</u> caacaaagttg                                              | <i>NtATG8f</i>                                          |
| <b><i>Other primers used in this work (restriction enzyme sites are underlined)</i></b>                                 |                                                         |
| R: agccgacaaccttgattggagac                                                                                              | used to sequence inserts in pDEST22 or pDEST32          |
| R1: caggcatctagcgcacatccaca<br>R2: tcattcagggtgtgtgggctcgt                                                              | used for 5'RACE-PCR to amplify 5'-end of <i>NtJoka2</i> |
| F1: atgtggatgatgcgctagatgcctg<br>F2: atgatgcagggagaacggctaaagct                                                         | used for 3'RACE-PCR to amplify 3'-end of <i>NtJoka2</i> |
| F: <u>cggaattc</u> ttttcgacaattgctgtgc<br>R: <u>gcctgc</u> agagcgtcaaacctcattacc                                        | used for cloning <i>UP9C</i> into pJK1 and JK2          |
| F: <u>cggaattc</u> gcgaaccgaggaggatgc<br>R: <u>cgctgc</u> agctacgaggaagagacgacagaa                                      | used for cloning <i>LSU1</i> into pGAD and pGBT         |
| F: <u>cgggatcc</u> atgtttcgacaattgct<br>R: gcaagcttgg <u>tac</u> ctcattgggaactgggaac                                    | used for cloning <i>UP9C</i> into pET28a                |
| F: <u>AGGATCC</u> ATGGCAAAGAGTTCATTC<br>r: <u>GGAATT</u> CGAAAGTTACACCAAGTTG                                            | used for cloning <i>ATG8f</i> into pET28a               |

# Supplementary Figure 1

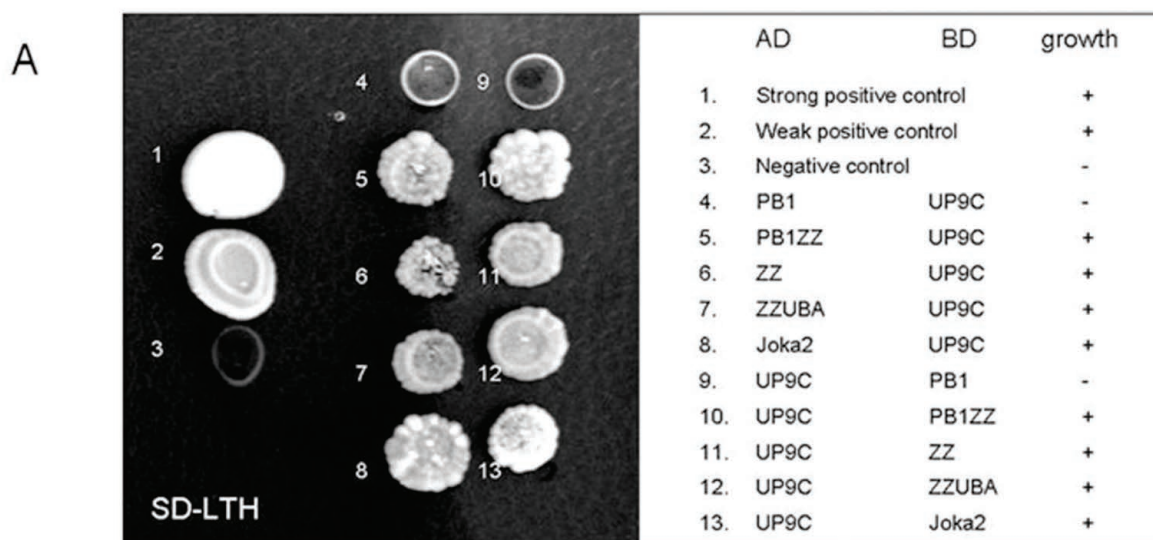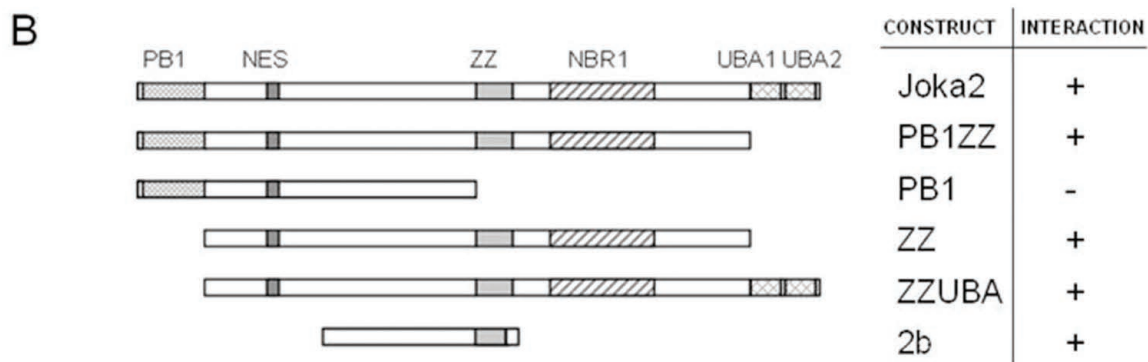

Supplementary Figure 2

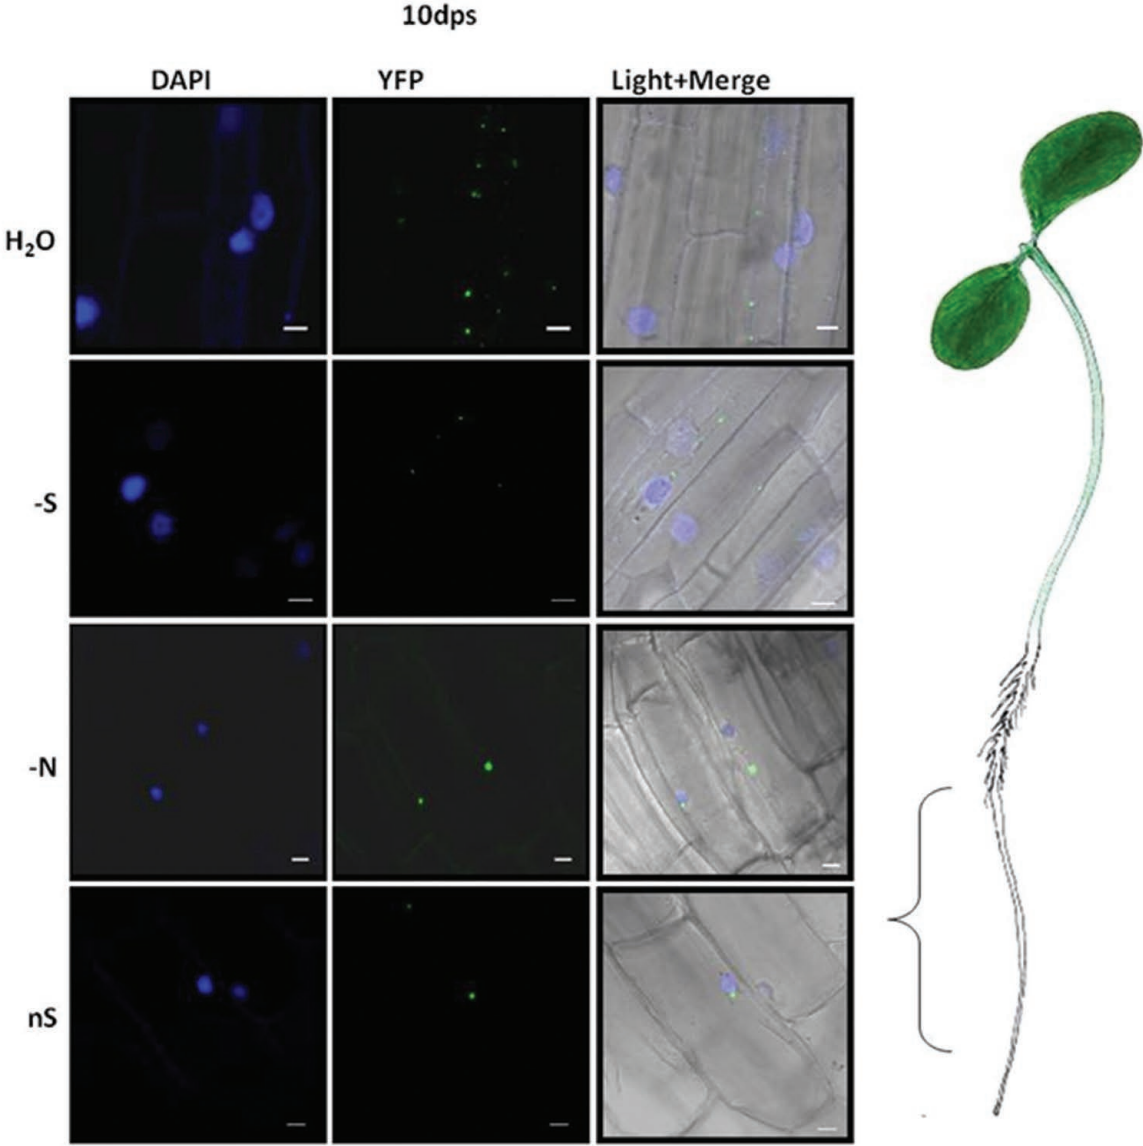

Supplementary Figure 3

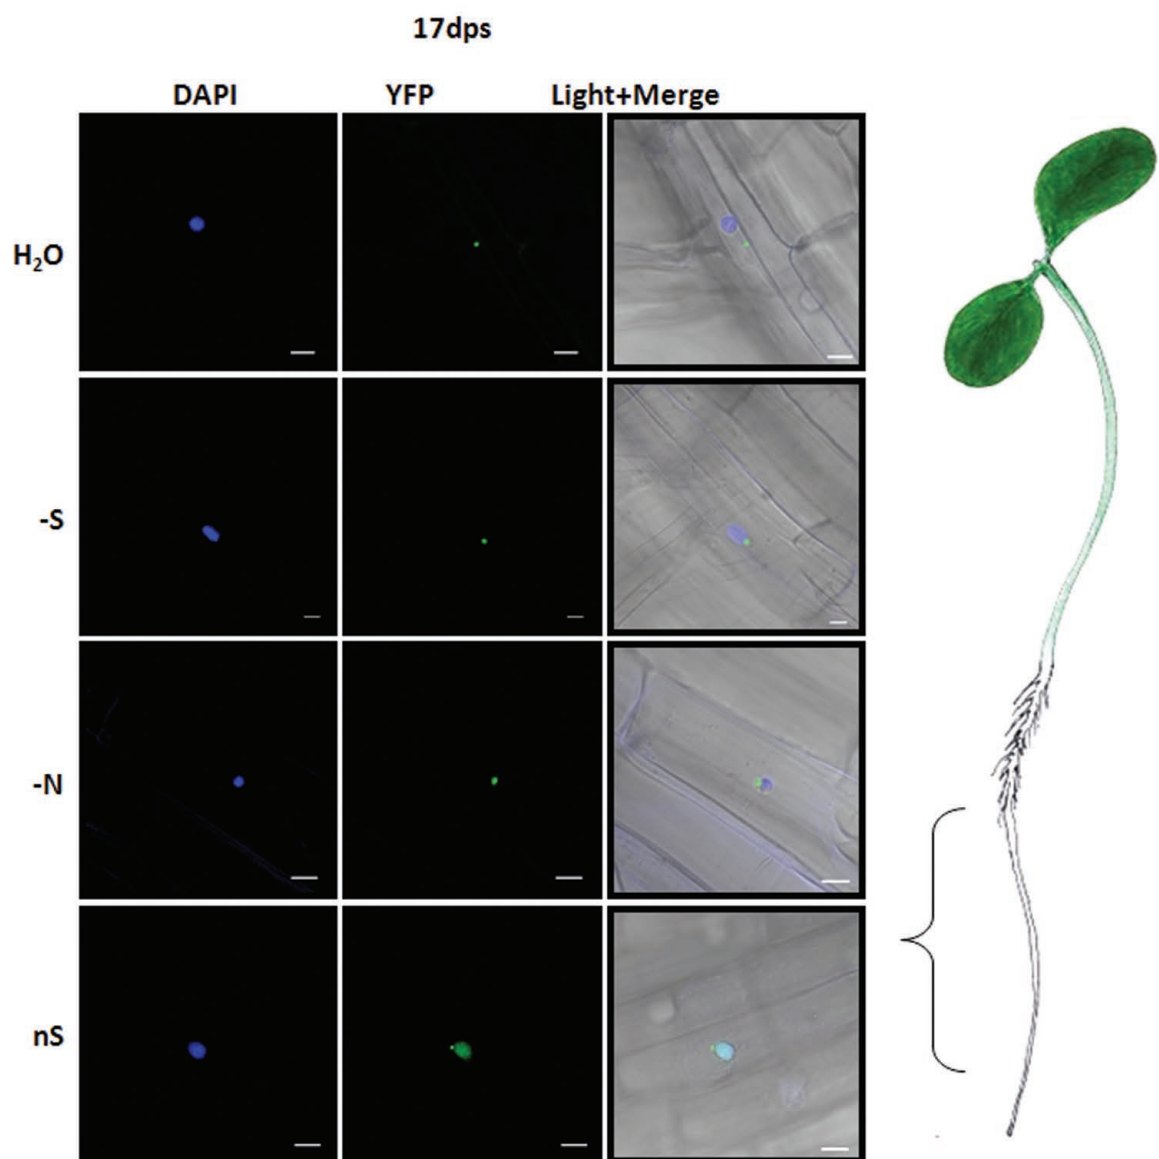



Supplementary Figure 4

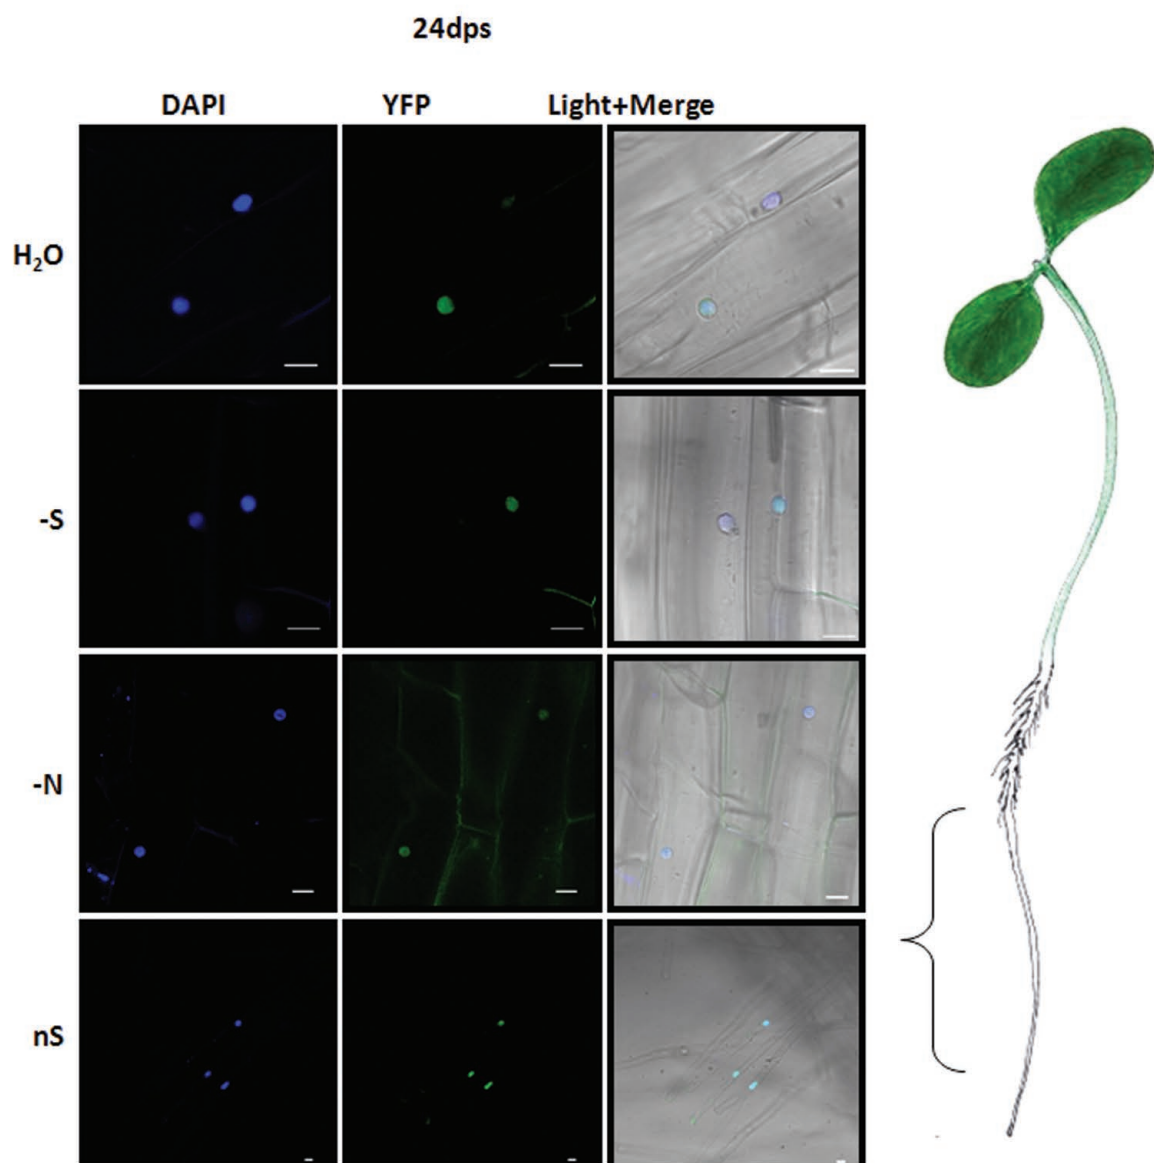

Supplementary Figure 5

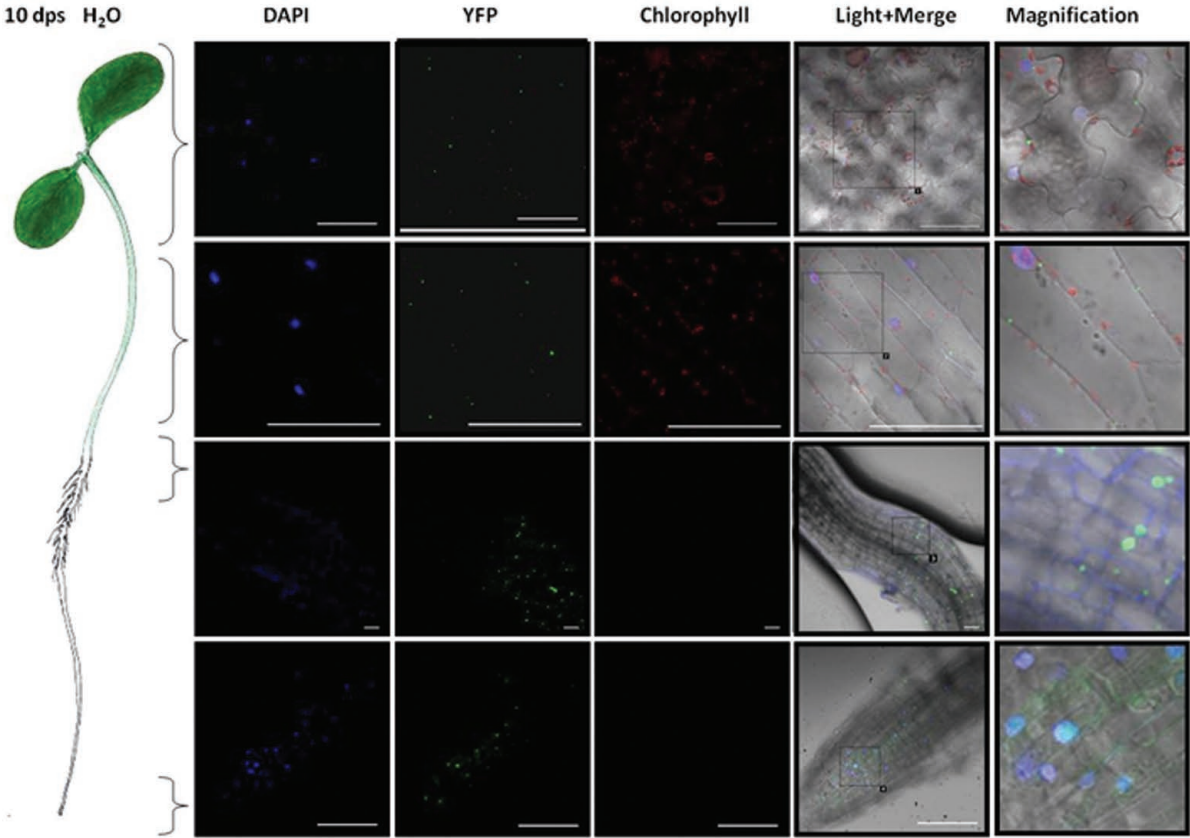

**Supplementary Figure 1.** Mapping of the UP9C interaction to the ZZ domain of NtJoka2. The yeast colonies along with descriptions (A) and the schemes of the constructs used for the experiment (B) are shown. All constructs contain *NtJoka2* cDNA from *Nicotiana tabacum*, except 2b, which contains *NpJoka2* cDNA from *Nicotiana plumbaginifolia*. The proof for UP9C interaction with the 2b fragment comes from the pool down experiment (see Fig. 1B).

**Supplementary Figure 2.** Localization of Joka2-YFP in roots elongation zone of tobacco seedlings grown for 10 days in the indicated conditions (-S, sulfur starvation; -N, nitrogen starvation; nS, nutrient sufficient medium and water). The signal for Joka2-YFP, DNA staining with DAPI and overlays of both with the transparent view image are shown. The scale bars (10  $\mu$ M) are indicated.

**Supplementary Figure 3.** Localization of Joka2-YFP in roots elongation zone of tobacco seedlings grown for 17 days in the indicated conditions (-S, sulfur starvation; -N, nitrogen starvation; nS, nutrient sufficient medium and water). The signal for Joka2-YFP, DNA staining with DAPI and overlays of both with the transparent view image are shown. The scale bars (10  $\mu$ M) are indicated.

**Supplementary Figure 4.** Localization of Joka2-YFP in roots elongation zone of tobacco seedlings grown for 24 days in the indicated conditions (-S, sulfur starvation; -N, nitrogen starvation; nS, nutrient sufficient medium and water). The signal for Joka2-YFP, DNA staining with DAPI and overlays of both with the transparent view image are shown. The scale bars (10  $\mu$ M) are indicated.

**Supplementary Figure 5.** Localization of Joka2-YFP in the indicated parts of tobacco seedlings grown for 10 days in water. The signal for Joka2-YFP, DNA staining with DAPI, chlorophyll (if present) and overlays of all with the transparent view image are shown. The right-hand panels are the magnification of the indicated parts. The scale bars (100  $\mu$ M) are indicated.
